# Supplementary material for: Combining Living Microorganisms with Regenerated Silk Provides Nanofibril-Based Thin Films with Heat-Responsive Wrinkled States for Smart Food Packaging
Source: PubMed Central journal article supplement (PMC6071141; doi:10.3390/nano8070518), 2018-07-11
Supplement: nanomaterials-08-00518-s001.pdf [file nanomaterials-08-00518-s001.pdf]

## Supplementary Materials

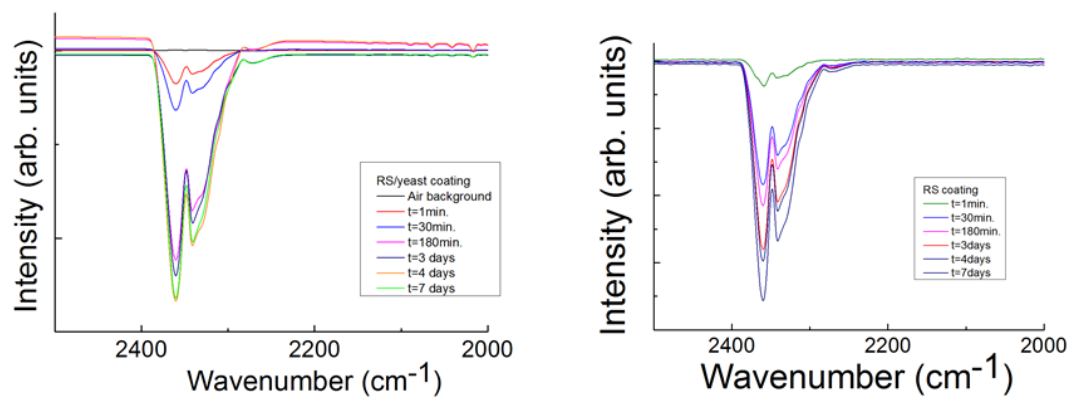

**Figure S1.** Evolution of the CO<sub>2</sub> absorption peak over period of 7 days for (left) RS/yeast and (right) RS coatings, respectively.

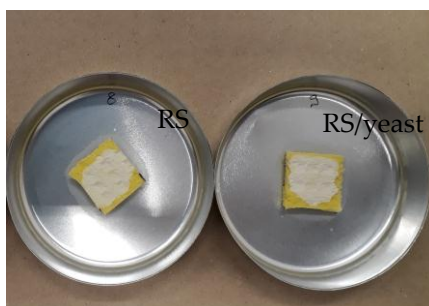

**Figure S2.** Water soaked sponges with different types of coatings. On the left it is evident the drying region around the sponge due to the water loss.
